# Supplementary material for: Alcohol amine-catalyzed CO2 conversion for the synthesis of quinazoline-2,4-(1H,3H)-dione in water
Source: Royal Society of Chemistry journal article supplement (doi:10.1039/d0ra06439d), 2020-01-01
Supplement: d0ra06439d1.pdf [file d0ra06439d1.pdf]

## Supplementary Information

### Alcohol amines catalyzed CO<sub>2</sub> conversion for the synthesis of quinazoline-2, 4-(1H, 3H)-dione in water

Zhi-Zheng Sheng,<sup>a,b</sup> Min-Min Huang,<sup>a</sup> Teng Xue,<sup>\*a</sup> Fei Xia<sup>\*a</sup> and Hai-Hong Wu<sup>\*a</sup>

<sup>a</sup> Shanghai Key laboratory of Green Chemistry and Chemical Process, School of Chemistry and Molecular Engineering, East China Normal University, Shanghai 200062, China. E-mail: txue@chem.ecnu.edu.cn; fxia@chem.ecnu.edu.cn; hhwu@chem.ecnu.edu.cn

<sup>b</sup> Shanghai Key Laboratory of Molecular Catalysis and Innovative Materials, Laboratory of Advanced Materials, Collaborative Innovation Centre of Chemistry for Energy Materials (iChEM), Department of Chemistry, Fudan University, Shanghai 200433, China.

---

## Contents

|                          |   |
|--------------------------|---|
| NMR Data .....           | 3 |
| FT-IR Spectra.....       | 5 |
| Supplementary Table..... | 6 |
| References.....          | 7 |

---

## NMR Data

The quinazoline-2, 4-(1H, 3H)-diones were identified by matching the NMR data with those reported literature.<sup>[1]</sup>

### Quinazoline-2, 4(1H, 3H)-dione (2a).

<sup>1</sup>H NMR (DMSO-d<sub>6</sub>, 500 MHz)  $\delta$ : 11.21 (s, 2H), 7.89 (d,  $J$  = 7.3 Hz, 1H), 7.64 (t,  $J$  = 6.9 Hz, 1H), 7.17 (d,  $J$  = 7.7 Hz, 2H); <sup>13</sup>C NMR (DMSO-d<sub>6</sub>, 126 MHz)  $\delta$ : 163.29, 150.76, 141.34, 135.41, 127.41, 122.77, 115.78, 114.79.

### 6-Fluoroquinazoline-2, 4(1H, 3H)-dione (2b).

<sup>1</sup>H NMR (DMSO-d<sub>6</sub>, 500 MHz)  $\delta$ : 11.30 (s, 2H), 7.63 – 7.43 (m, 2H), 7.19 (dd,  $J$  = 9.0, 4.4 Hz, 1H); <sup>13</sup>C NMR (DMSO-d<sub>6</sub>, 126 MHz)  $\delta$ : 162.55, 158.67, 150.49, 137.99, 123.42, 118.03, 115.86, 112.30.

### 6-Chloroquinazoline-2, 4(1H, 3H)-dione (2c).

<sup>1</sup>H NMR (DMSO-d<sub>6</sub>, 500 MHz)  $\delta$ : 11.35 (d,  $J$  = 77.6 Hz, 2H), 7.80 (d,  $J$  = 2.5 Hz, 1H), 7.67 (dd,  $J$  = 8.7, 2.5 Hz, 1H), 7.18 (d,  $J$  = 8.7 Hz, 1H); <sup>13</sup>C NMR (DMSO-d<sub>6</sub>, 126 MHz)  $\delta$ : 162.26, 150.49, 140.17, 135.24, 126.73, 126.36, 117.96, 116.23.

### 6-Bromoquinazoline-2, 4(1H, 3H)-dione (2d).

<sup>1</sup>H NMR (DMSO-d<sub>6</sub>, 500 MHz)  $\delta$ : 11.35 (s, 2H), 7.93 (d,  $J$  = 2.3 Hz, 1H), 7.77 (dd,  $J$  = 8.7, 2.4 Hz, 1H), 7.11 (d,  $J$  = 8.7 Hz, 1H); <sup>13</sup>C NMR (DMSO-d<sub>6</sub>, 126 MHz)  $\delta$ : 162.16, 150.49, 140.51, 137.92, 129.36, 118.21, 116.65, 114.27.

### 7-Chloroquinazoline-2, 4(1H, 3H)-dione (2e).

<sup>1</sup>H NMR (DMSO-d<sub>6</sub>, 500 MHz)  $\delta$ : 11.31 (s, 2H), 7.87 (d,  $J$  = 8.4 Hz, 1H), 7.19 (d,  $J$  = 10.4 Hz, 1H), 7.16 (s, 1H); <sup>13</sup>C NMR (DMSO-d<sub>6</sub>, 126 MHz)  $\delta$ : 162.52, 150.62, 142.39, 139.73, 129.45, 122.90, 115.12, 113.77.

### 7-methylquinazoline-2, 4(1H, 3H)-dione (2f).

<sup>1</sup>H NMR (DMSO-d<sub>6</sub>, 500 MHz)  $\delta$ : 11.12 (s, 2H), 7.76 (d,  $J$  = 8.0 Hz, 1H), 6.99 (d,  $J$  = 8.1 Hz, 1H), 6.94 (s, 1H), 2.35 (s, 3H); <sup>13</sup>C NMR (DMSO-d<sub>6</sub>, 126 MHz)  $\delta$ : 163.15,

---

150.91, 146.02, 141.38, 127.35, 124.09, 115.50, 112.50, 21.42.

**6, 7-Dimethoxyquinazoline-2, 4(1H, 3H)-dione (2g).**

<sup>1</sup>H NMR (DMSO-d<sub>6</sub>, 500 MHz)  $\delta$ : 11.10 (s, 1H), 10.92 (s, 1H), 7.26 (s, 1H), 6.68 (s, 1H), 3.83 (s, 3H), 3.79 (s, 3H); <sup>13</sup>C NMR (DMSO-d<sub>6</sub>, 126 MHz)  $\delta$ : 162.86, 155.34, 150.84, 145.47, 136.99, 107.60, 106.65, 98.21, 56.26, 56.16.

## FT-IR Spectra

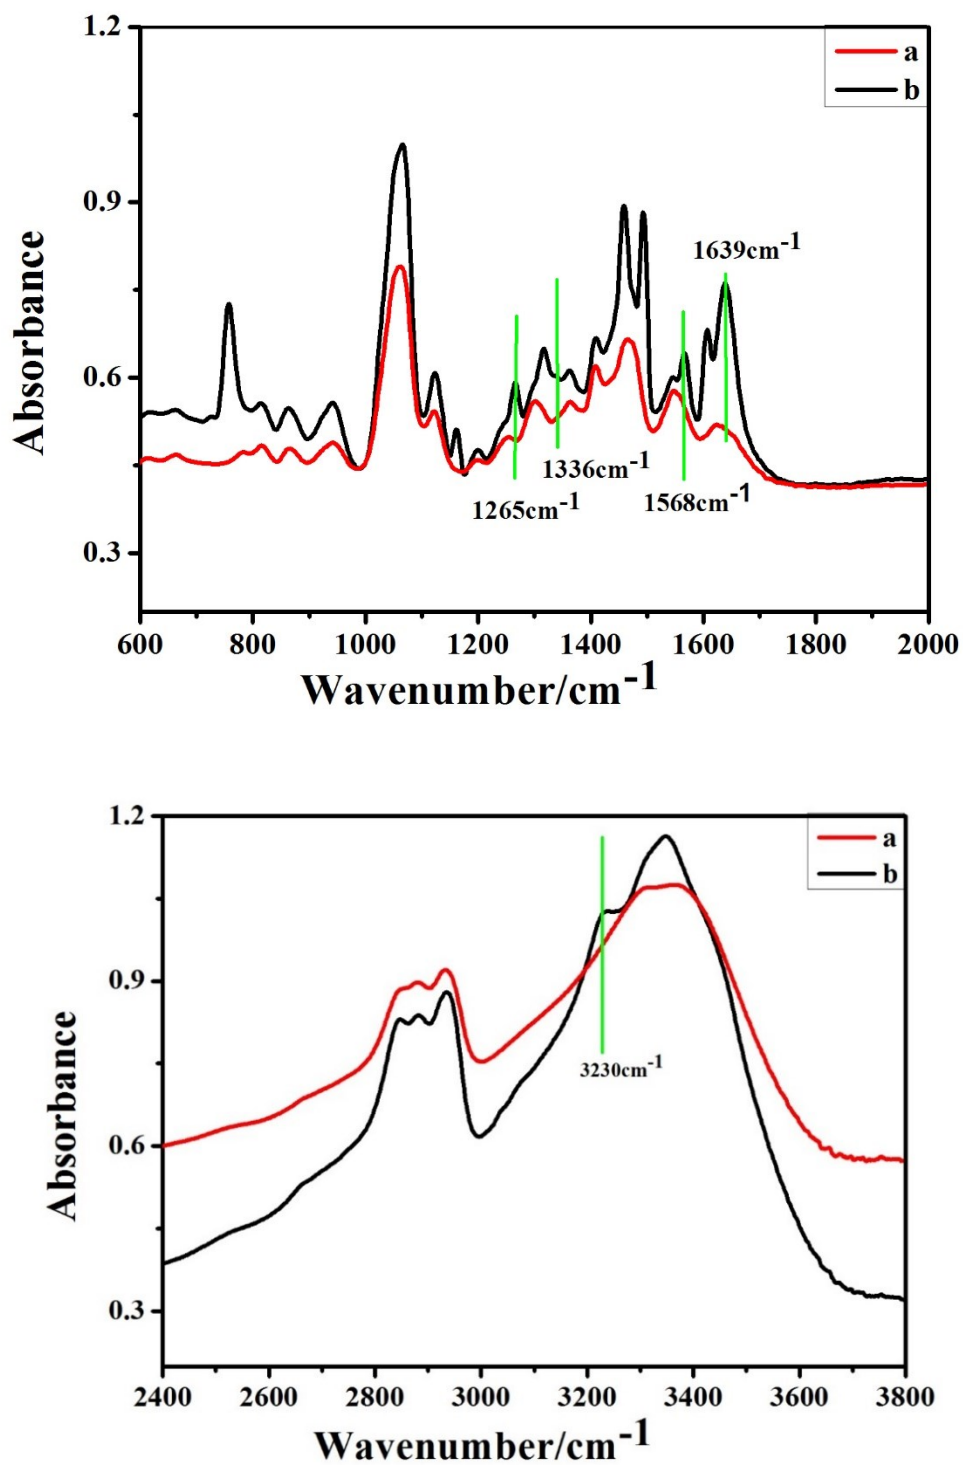

**Fig S1** FT-IR spectra of reaction mixture (a) before adding CO<sub>2</sub> and (b) after adding CO<sub>2</sub>.

## Supplementary Table

**Table S1** Several homogeneous catalysts used for synthesis of quinazoline-2,4(1H,3H)-diones.

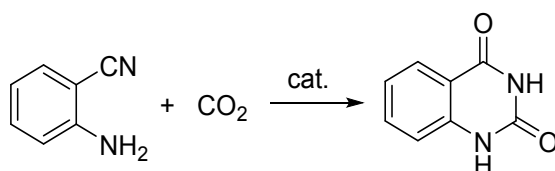

| Entry | Catalyst                            | Solvent      | Reaction Condition     | Isolated Yield (%) | Reference    |
|-------|-------------------------------------|--------------|------------------------|--------------------|--------------|
| 1     | DBU                                 | DMF          | 20 °C 1 bar<br>24 h    | 97                 | [2]          |
| 2     | TMG                                 | Solvent free | 120 °C 10 MPa<br>4 h   | 89                 | [3]          |
| 3     | Choline                             | water        | 90 °C 2 MPa<br>24 h    | 92                 | [4]          |
| 4     | [TBP][Arg]                          | DMF          | 100 °C 8.5 MPa<br>12 h | 91                 | [5]          |
| 5     | NHC, K <sub>2</sub> CO <sub>3</sub> | DMSO         | 120 °C 0.1 MPa<br>15 h | 95                 | [6]          |
| 6     | DEA                                 | water        | 100 °C 1 MPa<br>12 h   | 94                 | Current work |

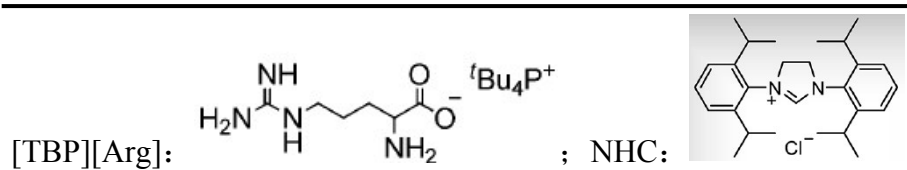

---

## References

- [1] a) Lu, W. J.; Ma, J.; Hu, J. Y.; Song, J. L.; Zhang, Z. F.; Yang, G. Y. and Han, B. X. Efficient synthesis of quinazoline-2,4(1H,3H)-diones from CO<sub>2</sub> using ionic liquids as a dual solvent-catalyst at atmospheric pressure. *Green Chem.* **2014**, *16*, 221-225; b) Zheng, H.; Cao, X. T.; Du, K.; Xu, J. and Zhang, P. F. A highly efficient way to capture CX<sub>2</sub> (O, S) mildly in reusable ReILs at atmospheric pressure. *Green Chem.* **2014**, *16*, 3142-3148.
- [2] Mizuno, T. and Ishino, Y. Highly efficient synthesis of 1H-quinazoline-2,4-diones using carbon dioxide in the presence of catalytic amount of DBU. *Tetrahedron* **2002**, *58*, 3155-3158.
- [3] Gao, J.; He, L. N.; Miao, C. X. and Chanfreau, S. Chemical fixation of CO<sub>2</sub>: efficient synthesis of quinazoline-2,4(1H,3H)-diones catalyzed by guanidines under solvent-free conditions. *Tetrahedron* **2010**, *66*, 4063-4067.
- [4] Lu, W. J.; Ma, J.; Hu, J. Y.; Zhang, Z. F.; Wu, C. Y. and Han, B. X. Choline hydroxide promoted chemical fixation of CO<sub>2</sub> to quinazoline-2,4(1H,3H)-diones in water. *RSC Adv.* **2014**, *4*, 50993-50997.
- [5] Lang, X. D.; Zhang, S.; Song, Q. W. and He, L. N. Tetra-butylphosphonium arginine-based ionic liquid-promoted cyclization of 2-aminobenzonitrile with carbon dioxide. *RSC Adv.* **2015**, *5*, 15668-15673.
- [6] Xiao, Y. Q.; Kong, X. Q.; Xu, Z. C.; Cao, C. S.; Pang, G. S. and Shi, Y. H. Efficient synthesis of quinazoline-2,4(1H,3H)-diones from CO<sub>2</sub> catalyzed by N-heterocyclic carbene at atmospheric pressure. *RSC Adv.* **2015**, *5*, 5032-5037.
